# Supplementary material
Source: PubMed Central journal article supplement (PMC9189581)
Supplement: sj-pdf-1-ajl-10.1177_1559827620988677.pdf [file sj-pdf-1-ajl-10.1177_1559827620988677.pdf]

The following is a survey to assess MEDICAL STUDENT or RESIDENT perceptions and opinions about healthy eating. Please read all directions and answer to the best of your abilities.

## **DEMOGRAPHICS/HEALTH INFORMATION**

---

Please bubble in the answer that best describes you, filling in the blank when necessary.

### **YEAR**

- M1
- M2
- M3
- M4
- Resident year 1
- Resident year 2
- Resident year 3

### **AREAS OF INTEREST – select ALL that apply**

- |                                                 |                                                            |
|-------------------------------------------------|------------------------------------------------------------|
| <input type="radio"/> Allergy/Immunology        | <input type="radio"/> Oncology                             |
| <input type="radio"/> Anesthesiology            | <input type="radio"/> Ophthalmology                        |
| <input type="radio"/> Cardiology                | <input type="radio"/> Orthopedics                          |
| <input type="radio"/> Critical Care             | <input type="radio"/> Otolaryngology                       |
| <input type="radio"/> Dermatology               | <input type="radio"/> Pain Management                      |
| <input type="radio"/> Emergency Medicine        | <input type="radio"/> Pediatrics                           |
| <input type="radio"/> Endocrinology             | <input type="radio"/> Physical Medicine and Rehabilitation |
| <input type="radio"/> Family Medicine           | <input type="radio"/> Preventive Medicine                  |
| <input type="radio"/> Gastroenterology          | <input type="radio"/> Psychiatry                           |
| <input type="radio"/> Genetics                  | <input type="radio"/> Pulmonology                          |
| <input type="radio"/> Hematology                | <input type="radio"/> Radiation Oncology                   |
| <input type="radio"/> Infectious Disease        | <input type="radio"/> Rheumatology                         |
| <input type="radio"/> Internal Medicine         | <input type="radio"/> Sports Medicine                      |
| <input type="radio"/> Nephrology                | <input type="radio"/> Surgery                              |
| <input type="radio"/> Neurology                 | <input type="radio"/> Urology                              |
| <input type="radio"/> Obstetrics and Gynecology | <input type="radio"/> Other not listed: _____              |

### **BIOLOGICAL SEX**

- Male
- Female
- Prefer not to answer

# DIET

**PLEASE READ THE FOLLOWING DIRECTIONS**

For the purposes of this survey, a **WHOLE-FOOD PLANT-BASED DIET** is one that:

**INCLUDES or EMPHASIZES whole plant foods**

- **Whole grains** – whole grain bread & pasta, brown rice
- **Fruits** – fresh, frozen, or canned
- **Vegetables** – fresh, frozen, or canned
- **Beans/legumes** – dried, or canned
- **Nuts/natural nut butters**
- **Seeds**
- **Plant milk** – soy, almond, cashew, etc.
- **Soy products** – tofu, tempeh, etc.

**EXCLUDES animal products**

- **Meats** – beef, pork, lamb, etc.
- **Poultry** – chicken, turkey, duck, etc.
- **Seafood/shellfish** – fish, shrimp, etc.
- **Dairy** – cow’s milk, butter, yogurt, cream
- **Eggs**

**GREATLY REDUCES**

- **Processed or refined foods** – packaged foods and snacks, frozen meals, etc.
- **Sugars & artificial sweeteners**
- **Fats & oils**
- **Salt**

Mark “yes” or “no” for the following questions:

|                                                                                                                    | YES | NO |
|--------------------------------------------------------------------------------------------------------------------|-----|----|
| I am familiar with or have heard of a whole-food plant-based diet                                                  | 0   | 0  |
| I am familiar with the health benefits of a whole-food plant-based diet                                            | 0   | 0  |
| I currently follow a whole-food plant-based diet, or variation (vegan, vegetarian, semi-vegetarian)                | 0   | 0  |
| I have followed a whole-food plant-based diet in the past, or variation (vegan, vegetarian, semi-vegetarian, etc.) | 0   | 0  |

Mark whether you strongly disagree, disagree, agree, strongly agree, or are neutral regarding the following statements.

|                                                                            | Strongly Disagree | Disagree | Neither Agree nor Disagree | Agree | Strongly Agree |
|----------------------------------------------------------------------------|-------------------|----------|----------------------------|-------|----------------|
| I try to follow a healthy diet                                             | 0                 | 0        | 0                          | 0     | 0              |
| My doctor or Dietitian/Nutritionist has told me to follow a healthier diet | 0                 | 0        | 0                          | 0     | 0              |
| My overall health would be better if I followed a healthier diet           | 0                 | 0        | 0                          | 0     | 0              |

*If you have heard of a whole-food plant-based diet, comment on your current attitudes/beliefs toward it*

## RECOMMENDATION

Given that each of the statements below is supported with scientific evidence with regards to a whole-food plant-based diet, **how likely would you be to RECOMMEND a whole-food plant-based diet TO YOUR PATIENTS for at least 3 weeks** for each of the statements given?

|                                          | Definitely will NOT recommend for this reason | Might recommend to CERTAIN patients for this reason | Would probably recommend to MOST patients for this reason | Definitely WOULD recommend for this reason | I am ALREADY recommending or planning to recommend to patients for this reason |
|------------------------------------------|-----------------------------------------------|-----------------------------------------------------|-----------------------------------------------------------|--------------------------------------------|--------------------------------------------------------------------------------|
| To lose weight                           | <input type="radio"/>                         | <input type="radio"/>                               | <input type="radio"/>                                     | <input type="radio"/>                      | <input type="radio"/>                                                          |
| To lower blood pressure to normal levels | <input type="radio"/>                         | <input type="radio"/>                               | <input type="radio"/>                                     | <input type="radio"/>                      | <input type="radio"/>                                                          |
| To manage or cure diabetes               | <input type="radio"/>                         | <input type="radio"/>                               | <input type="radio"/>                                     | <input type="radio"/>                      | <input type="radio"/>                                                          |
| To manage or cure heart disease          | <input type="radio"/>                         | <input type="radio"/>                               | <input type="radio"/>                                     | <input type="radio"/>                      | <input type="radio"/>                                                          |
| To slow down/prevent cancer              | <input type="radio"/>                         | <input type="radio"/>                               | <input type="radio"/>                                     | <input type="radio"/>                      | <input type="radio"/>                                                          |
| To lower cholesterol to normal levels    | <input type="radio"/>                         | <input type="radio"/>                               | <input type="radio"/>                                     | <input type="radio"/>                      | <input type="radio"/>                                                          |
| To lower saturated fat intake            | <input type="radio"/>                         | <input type="radio"/>                               | <input type="radio"/>                                     | <input type="radio"/>                      | <input type="radio"/>                                                          |
| To go off of prescription medications    | <input type="radio"/>                         | <input type="radio"/>                               | <input type="radio"/>                                     | <input type="radio"/>                      | <input type="radio"/>                                                          |
| To prevent chronic diseases              | <input type="radio"/>                         | <input type="radio"/>                               | <input type="radio"/>                                     | <input type="radio"/>                      | <input type="radio"/>                                                          |

|                                                                                                  | Extremely unlikely    | Moderately unlikely   | Neither likely nor unlikely | Moderately likely     | Extremely Likely      |
|--------------------------------------------------------------------------------------------------|-----------------------|-----------------------|-----------------------------|-----------------------|-----------------------|
| How likely would you be to recommend a whole-food plant-based diet for ANY of the above reasons? | <input type="radio"/> | <input type="radio"/> | <input type="radio"/>       | <input type="radio"/> | <input type="radio"/> |

*What OTHER REASONS would motivate you to recommend a whole-food plant-based diet to patients?*

**BARRIERS**

When considering RECOMMENDING a whole-food plant-based diet TO YOUR PATIENTS for at least 3 weeks, which factors would prevent this or get in your way? In other words, **what are the reasons you might NOT recommend a whole-food plant-based diet to your patients?**

|                                                                      | Strongly Disagree | Disagree | Not Sure or Not Applicable | Agree | Strongly Agree |
|----------------------------------------------------------------------|-------------------|----------|----------------------------|-------|----------------|
| They do not like vegetables                                          | 0                 | 0        | 0                          | 0     | 0              |
| They will not want to change their diets/lifestyle                   | 0                 | 0        | 0                          | 0     | 0              |
| They will not want to try new foods                                  | 0                 | 0        | 0                          | 0     | 0              |
| They will not have enough will power                                 | 0                 | 0        | 0                          | 0     | 0              |
| They would not get enough to eat                                     | 0                 | 0        | 0                          | 0     | 0              |
| They would not get enough iron                                       | 0                 | 0        | 0                          | 0     | 0              |
| They would not get enough protein                                    | 0                 | 0        | 0                          | 0     | 0              |
| They would not get enough calcium                                    | 0                 | 0        | 0                          | 0     | 0              |
| They would not know what to buy at the grocery store                 | 0                 | 0        | 0                          | 0     | 0              |
| They would not know what to cook                                     | 0                 | 0        | 0                          | 0     | 0              |
| They would not know what to order at restaurants                     | 0                 | 0        | 0                          | 0     | 0              |
| They would not have enough time                                      | 0                 | 0        | 0                          | 0     | 0              |
| Their household would not eat plant-based foods                      | 0                 | 0        | 0                          | 0     | 0              |
| They do not have access to a grocery store with a variety of produce | 0                 | 0        | 0                          | 0     | 0              |
| It would give them indigestion, gas, and/or stomach upset            | 0                 | 0        | 0                          | 0     | 0              |
| They would miss eating meat                                          | 0                 | 0        | 0                          | 0     | 0              |
| They would miss eating cheese/dairy                                  | 0                 | 0        | 0                          | 0     | 0              |
| They would miss eating eggs                                          | 0                 | 0        | 0                          | 0     | 0              |
| They would miss going out to eat                                     | 0                 | 0        | 0                          | 0     | 0              |
| It would be too expensive                                            | 0                 | 0        | 0                          | 0     | 0              |

*If you have any other reasons for not wanting to recommend a whole-food plant-based diet or comments about reasons listed above, please include them here:*

## CURRICULUM

If you are NOT WILLING TO RECOMMEND a whole-food plant-based diet to your patients for at least 3 weeks for ANY reason, **which of the following factors might help change your mind?**

|                                                                                                    | Strongly Disagree | Disagree | Not Sure | Agree | Strongly Agree |
|----------------------------------------------------------------------------------------------------|-------------------|----------|----------|-------|----------------|
| Attending a whole-food plant-based nutrition elective in medical school                            | 0                 | 0        | 0        | 0     | 0              |
| Incorporating more whole-food plant-based nutrition into current medical school classes            | 0                 | 0        | 0        | 0     | 0              |
| If more focus were put on whole-food plant-based nutrition on national board or shelf examinations | 0                 | 0        | 0        | 0     | 0              |
| Attending a whole-food plant-based cooking class as an elective in medical school                  | 0                 | 0        | 0        | 0     | 0              |
| Adding whole-food plant-based nutrition competencies to internal medicine residency requirements   | 0                 | 0        | 0        | 0     | 0              |
| Adding whole-food plant-based nutrition competencies to cardiology licensure requirements          | 0                 | 0        | 0        | 0     | 0              |
| Doing my own research on whole-food plant-based nutrition                                          | 0                 | 0        | 0        | 0     | 0              |
| Seeing that a whole-food plant-based diet works for others in clinical practice                    | 0                 | 0        | 0        | 0     | 0              |
| Seeing a nutritionally-complete and detailed meal plan                                             | 0                 | 0        | 0        | 0     | 0              |
| Getting more information or evidence in general                                                    | 0                 | 0        | 0        | 0     | 0              |

*If you agreed to the statement, "Getting more information or evidence in general," what kind of information or evidence in specific are you interested in?*

*Do you have any other suggestions or ideas related to general nutrition education in medical school?*

How much do you agree with the following statements?

|                                                                                               | Strongly Disagree     | Disagree              | Neither Agree nor Disagree | Agree                 | Strongly Agree        | Not Applicable        |
|-----------------------------------------------------------------------------------------------|-----------------------|-----------------------|----------------------------|-----------------------|-----------------------|-----------------------|
| I received/am receiving enough nutrition education in my medical school training              | <input type="radio"/> | <input type="radio"/> | <input type="radio"/>      | <input type="radio"/> | <input type="radio"/> | <input type="radio"/> |
| I received/am receiving enough nutrition education in my residency training                   | <input type="radio"/> | <input type="radio"/> | <input type="radio"/>      | <input type="radio"/> | <input type="radio"/> | <input type="radio"/> |
| More focus should be put on PLANT-BASED nutrition in medical school and/or residency programs | <input type="radio"/> | <input type="radio"/> | <input type="radio"/>      | <input type="radio"/> | <input type="radio"/> | <input type="radio"/> |

*Do you have any other comments or ideas about teaching whole-food plant-based nutrition to medical students?*
